# Supplementary material for: Preparation of novel arsenic-imprinted polymer for the selective extraction and enhanced adsorption of toxic As3+ ions from the aqueous environment
Source: Springer Nature journal article supplement (doi:10.1007/s00289-019-03008-2), 2019-11-07
Supplement: MOESM1 [file 17363308]

## Sheet: Langmuir Isotherm
Langmuir Isotherm
Cini mg/L	Ce mg/L	Cads mg/L	% ads	log Ce mg/dm3	log ads mg/dm3	C ads mg/g	Ce/log Cads mg/gm
5	0.4	4.6	94	-0.39794	0.662758	23	0.0173913
10	1.216	8.784	87.84	0.0849336	0.943692	43.92	0.0276867
15	2.67	12.33	81.53	0.426511	1.09096	61.65	0.043309
20	4.85	15.15	75.75	0.685742	1.18041	75.75	0.0640264
25	7.31	17.69	70.76	0.863917	1.24773	88.45	0.0826456
Slope = 0.0094				Ce mg/L	Ce/log Cads mg/gm
Intercept 0.016				0.4	0.0173913
R2 = 0.9927				1.216	0.0276867
				2.67	0.043309
enthalpy of sorption = slope/ intercept				4.85	0.0640264
0.58				7.31	0.0826456
Capacity (Q) = monolayer sorption saturation capacity = 1/slope mg/g
106.38
RL = dimension less constant separation constant
1/1+bxCi
3.9	15.5
0.25641	0.0645161

## Sheet: Freundlich Isotherm
Freundlich Isotherm
Cini mg/L	Ce mg/L	Cads mg/L	% ads	log Ce mg/dm3	log ads mg/dm3	C ads mg/g	Ce/log Cads mg/gm
5	0.4	4.6	94	-0.39794	0.662758	23	0.0173913
10	1.216	8.784	87.84	0.0849336	0.943692	43.92	0.0276867
15	2.67	12.33	81.53	0.426511	1.09096	61.65	0.043309
20	4.85	15.15	75.75	0.685742	1.18041	75.75	0.0640264
25	7.31	17.69	70.76	0.863917	1.24773	88.45	0.0826456
				log Ce mg/dm3	log ads mg/dm3
				-0.39794	0.662758
				0.0849336	0.943692
				0.426511	1.09096
				0.685742	1.18041
				0.863917	1.24773
Slope = 0.4592
intercept = 0.8724
R2 = 0.9871
Capacity = antilog intercept
7.454
